# Supplementary material for: Silymarin Synergizes with Antiviral Therapy in Hepatitis B Virus-Related Liver Cirrhosis: A Propensity Score Matching Multi-Institutional Study
Source: MDPI journal article supplement (doi:10.3390/ijms25063088), 2024-03-07
Supplement: s1 [file s1]

**Supplementary Table S1. Changes in laboratory parameters and clinical indices one year after the index date in the two cohorts of patients with HBV-related liver cirrhosis.**

|                                  | Case<br>(anti-HBV+ Silymarin)<br>(n=319) |             |         | Control<br>(anti-HBV agent)<br>(n=319) |              |         |
|----------------------------------|------------------------------------------|-------------|---------|----------------------------------------|--------------|---------|
|                                  | Before                                   | After       | p-value | Before                                 | After        | p-value |
| Biochemistry, mean±SD            |                                          |             |         |                                        |              |         |
| Cr (mg/dL)                       | 1.17±1.37                                | 1.24±1.4    | 0.056   | 1.1±1.5                                | 1.29±1.79    | <0.001  |
| Na (mEq/L)                       | 137.62±3.89                              | 138.32±3.84 | 0.021   | 137.54±4.26                            | 137.49±5.6   | 0.929   |
| AST(U/L)                         | 129.72±228.83                            | 54.06±80.44 | <0.001  | 138.3±248.32                           | 65.35±138.87 | 0.002   |
| ALT(U/L)                         | 125.51±257.16                            | 38.31±30.66 | <0.001  | 136.68±281.5                           | 56.87±159.74 | 0.002   |
| Bilirubin Total (mg/dL)          | 3.33±5.09                                | 1.5±1.69    | <0.001  | 3.13±4.31                              | 2.17±3.67    | 0.033   |
| Albumin (g/dL)                   | 3.34±0.75                                | 3.82±0.7    | <0.001  | 3.27±0.77                              | 3.64±0.79    | <0.001  |
| HBV-DNA(log10 IU/mL)             | 7.37±8.01                                | 6.5±7.17    | <0.001  | 7.47±8.1                               | 6.31±6.68    | <0.001  |
| Hemogram                         |                                          |             |         |                                        |              |         |
| INR                              | 1.25±0.3                                 | 1.18±0.24   | 0.001   | 1.2±0.44                               | 1.23±0.45    | 0.500   |
| Clinical Index                   |                                          |             |         |                                        |              |         |
| MELD score                       | 12.68±5.28                               | 11.04±4.77  | <0.001  | 12.44±5.67                             | 12.36±6.47   | 0.896   |
| ALBI score                       | -1.84±0.77                               | -2.35±0.68  | <0.001  | -1.75±0.8                              | -2.14±0.8    | <0.001  |
| CCI (Charlson Comorbidity Index) | 1.93±2.43                                | 2.7±2.86    | <0.001  | 2.11±2.63                              | 1.81±2.58    | 0.111   |

**Supplementary Table S2**

| index year | Case cohort<br>(anti-HBV+ Silymarin)<br>(n=319) |       | Control cohort<br>(anti-HBV agent)<br>(n=319) |       | ASMD  |
|------------|-------------------------------------------------|-------|-----------------------------------------------|-------|-------|
|            | N                                               | %     | N                                             | %     |       |
| 2003       | 0                                               | 0     | 13                                            | 4.08  | 0.658 |
| 2004       | 0                                               | 0     | 6                                             | 1.88  |       |
| 2005       | 0                                               | 0     | 7                                             | 2.19  |       |
| 2006       | 23                                              | 7.21  | 14                                            | 4.39  |       |
| 2007       | 25                                              | 7.84  | 19                                            | 5.96  |       |
| 2008       | 17                                              | 5.33  | 16                                            | 5.02  |       |
| 2009       | 18                                              | 5.64  | 12                                            | 3.76  |       |
| 2010       | 35                                              | 10.97 | 19                                            | 5.96  |       |
| 2011       | 28                                              | 8.78  | 18                                            | 5.64  |       |
| 2012       | 16                                              | 5.02  | 21                                            | 6.58  |       |
| 2013       | 33                                              | 10.34 | 17                                            | 5.33  |       |
| 2014       | 20                                              | 6.27  | 18                                            | 5.64  |       |
| 2015       | 25                                              | 7.84  | 20                                            | 6.27  |       |
| 2016       | 26                                              | 8.15  | 23                                            | 7.21  |       |
| 2017       | 21                                              | 6.58  | 36                                            | 11.29 |       |

|      |    |      |    |       |  |
|------|----|------|----|-------|--|
| 2018 | 19 | 5.96 | 19 | 5.96  |  |
| 2019 | 13 | 4.08 | 41 | 12.85 |  |

Absolute Standardized Mean Difference (ASMD) > 0.1 indicating statistical significance

**Supplementary Table S3.** Competing risk analysis for mortality as the primary outcome, with LT<sup>a</sup> as the competing risk event (adding index year into the model for adjustment)

| Follow-up duration   | Competing risk analysis |         |                  |         |
|----------------------|-------------------------|---------|------------------|---------|
|                      | One-year                |         | Two-years        |         |
| Variable             | HR (95% CI)             | p-value | HR (95% CI)      | p-value |
| Cohort               |                         |         |                  |         |
| Case <sup>b</sup>    | 0.45 (0.31-0.65)        | <0.001  | 0.43 (0.32-0.59) | <0.001  |
| Control <sup>c</sup> | 1(Reference)            |         | 1(Reference)     |         |

a: LT=liver transplantation; b: Case: Silymarin+ anti-HBV agents (IFN or nucleoside /nucleotide analogs); c: Control: anti-HBV agents.

**Supplementary Table S4.** Competing risk analysis for HCC occurrence as the secondary outcome, with mortality or LT<sup>a</sup> as the competing risk events (adding index year into the model for adjustment)

| Follow-up duration   | Competing risk analysis |         |                  |         |
|----------------------|-------------------------|---------|------------------|---------|
|                      | One-year                |         | Two-years        |         |
| Variable             | HR (95% CI)             | p-value | HR (95% CI)      | p-value |
| Cohort               |                         |         |                  |         |
| Case <sup>b</sup>    | 1.06 (0.71-1.59)        | 0.767   | 1.01 (0.78-1.59) | 0.549   |
| Control <sup>c</sup> | 1(Reference)            |         | 1(Reference)     |         |

a: LT=liver transplantation; b: Case: Silymarin+ anti-HBV agents (IFN or nucleoside /nucleotide analogs); c: Control: anti-HBV agents.
